# Supplementary material for: Correction to: Real wage growth in the U.S. health workforce and the narrowing of the gender pay gap
Source: Hum Resour Health. 2021 Nov 10;19:137. doi: 10.1186/s12960-021-00676-y (PMC8582199; doi:10.1186/s12960-021-00676-y)
Supplement: Supplementary file 1 — Additional file 1. Table S1. Summary Statistics (2001–2017). [file 12960_2021_676_MOESM1_ESM.xlsx]

## Sheet: Sheet1
	Table 1. Summary Statistics (2001-2017)
	Percentage of Full-time, Full-year Workers , Aged 18-75, by Year, Regression Variable and Gender
	2001			2004			2008			2013			2017
Percent of Sample in Occupation	Total	Male	Female	Total	Male	Female	Total	Male	Female	Total	Male	Female	Total	Male	Female
Healthcare Support	0.190475	0.0925926	0.224727	0.188469	0.0889984	0.222904	0.198315	0.0944117	0.230948	0.198126	0.114354	0.224444	0.167616	0.0980945	0.189009
Nurses	0.20185	0.0701459	0.247938	0.202179	0.074439	0.2464	0.206275	0.0832586	0.244911	0.207109	0.0920039	0.243271	0.21582	0.108983	0.248695
Direct Patient Care	0.264052	0.307969	0.248684	0.266306	0.307608	0.252008	0.257314	0.294076	0.245768	0.265052	0.292033	0.256576	0.275584	0.292425	0.270402
Healthcare Practitioners	0.288316	0.363861	0.26188	0.287138	0.362452	0.261066	0.282126	0.359357	0.257869	0.275159	0.341724	0.254247	0.28916	0.352941	0.269534
Physicians/ Surgeons Aged 35+	0.0553066	0.165432	0.0167701	0.0559074	0.166502	0.0176216	0.0559703	0.168896	0.0205031	0.0545546	0.159886	0.0214627	0.0518204	0.147557	0.0223607
Percent of Sample by Gender
Male	0.259223			0.257157			0.239009			0.239063			0.235309
Female	0.740777			0.742843			0.760991			0.760937			0.764691
Percent of Sample by Age
18-34	0.263121	0.220314	0.278101	0.244292	0.201752	0.259019	0.249597	0.205982	0.263295	0.262839	0.224404	0.274914	0.278349	0.242564	0.289361
35 to 40	0.159839	0.161728	0.159178	0.145877	0.152928	0.143436	0.143388	0.152673	0.140472	0.135237	0.139452	0.133912	0.14076	0.137532	0.141754
41 to 49	0.295269	0.292705	0.296167	0.275709	0.265353	0.279294	0.240248	0.233046	0.24251	0.214717	0.217063	0.21398	0.205844	0.213717	0.203422
50 to 59	0.224165	0.253535	0.213887	0.258959	0.285386	0.249811	0.268732	0.278985	0.265512	0.260185	0.252938	0.262461	0.234809	0.230447	0.236151
60 plus	0.057605	0.0717172	0.0526667	0.0751626	0.0945813	0.0684402	0.0980343	0.129314	0.0882101	0.127023	0.166142	0.114733	0.140237	0.17574	0.129312
Percent of Sample by Race/Ethnicity
non-Hispanic White	0.771296	0.780471	0.768086	0.767165	0.780405	0.762581	0.706904	0.720431	0.702655	0.688667	0.690499	0.688092	0.674853	0.670661	0.676143
non-Hispanic Black	0.11041	0.0852974	0.119197	0.108944	0.0801314	0.118918	0.131244	0.0981164	0.141648	0.127888	0.100864	0.136378	0.120724	0.097663	0.127821
Hispanic or Latino	0.0554521	0.0593715	0.0540806	0.0603271	0.0569239	0.0615052	0.0812012	0.0815427	0.081094	0.0914113	0.0905211	0.091691	0.104266	0.103306	0.104561
Asians/Other	0.0628418	0.0748597	0.0586364	0.0635645	0.0825397	0.0569956	0.0806513	0.0999103	0.0746026	0.0920338	0.118115	0.0838399	0.100157	0.128369	0.0914756
Percent of Sample by Education
High School or Lower	0.184772	0.108305	0.211531	0.172733	0.0985222	0.198424	0.171416	0.0998323	0.193898	0.154231	0.101841	0.170691	0.144736	0.101846	0.157935
Some College	0.338968	0.230527	0.376915	0.346057	0.221894	0.38904	0.364828	0.251804	0.400326	0.360605	0.260678	0.391999	0.340918	0.259295	0.366035
Bachelor's Degree or Higher	0.47626	0.661167	0.411554	0.481209	0.679584	0.412536	0.463757	0.648364	0.405776	0.485164	0.637481	0.43731	0.514346	0.638859	0.47603
Percent of Sample by Industry
Hospital	0.334196	0.286756	0.350797	0.330575	0.282978	0.347052	0.321459	0.28421	0.333158	0.327699	0.302195	0.335712	0.325749	0.314002	0.329363
Ambulatory	0.238363	0.305948	0.214712	0.241027	0.31549	0.215249	0.251461	0.320477	0.229785	0.236988	0.300315	0.217093	0.239355	0.291495	0.223311
Long-term Care	0.152624	0.06633	0.182821	0.155702	0.0747674	0.18372	0.152923	0.0726904	0.178123	0.164061	0.0856389	0.188699	0.158031	0.0907914	0.178722
Govt., Educ., Community Org.	0.274817	0.340965	0.251669	0.272697	0.326765	0.253979	0.274157	0.322622	0.258935	0.271251	0.311851	0.258496	0.276865	0.303711	0.268604
Percent of Sample by Nativity
Native Born	0.903032	0.892368	0.906763	0.895983	0.879475	0.901698	0.865392	0.841282	0.872964	0.857709	0.833532	0.865304	0.855342	0.829969	0.863149
Naturalized Citizen	0.0610381	0.0682379	0.0585186	0.0688849	0.0819923	0.0643474	0.090932	0.107866	0.0856135	0.102988	0.121406	0.0972015	0.107484	0.128104	0.101139
Non-Citizen	0.0359304	0.0393939	0.0347184	0.0351322	0.0385331	0.0339548	0.0436764	0.0508521	0.0414227	0.0393035	0.0450617	0.0374945	0.0371742	0.0419267	0.0357117
Percent of Sample by Hours Worked
30 to 34	0.0833527	0.0358025	0.0999921	0.0925316	0.0437876	0.109406	0.0899813	0.0431697	0.104684	0.0960368	0.0518245	0.109927	0.0864872	0.0487319	0.0981051
35 to 40	0.641161	0.52211	0.682821	0.642626	0.534866	0.67993	0.641734	0.531334	0.676408	0.656764	0.559365	0.687364	0.660316	0.574658	0.686674
41 to 50	0.175841	0.243771	0.15207	0.168313	0.227586	0.147794	0.173941	0.240377	0.153075	0.160888	0.221149	0.141956	0.169397	0.220754	0.153593
51 or More	0.0996451	0.198316	0.0651166	0.096529	0.19376	0.0628695	0.0943433	0.185119	0.065833	0.0863103	0.167661	0.0607524	0.0838001	0.155856	0.0616273
Total Sample Size by Year	34372	8902	25470	35523	9129	26394	107289	25642	81647	115664	27644	88020	128019	30084	97935
Source: American Community Survey, Years 2001, 2004, 2008, 2013, 2017
